# Supplementary material for: Understanding maternity care providers’ use of data: A qualitative study in Southern Tanzania
Source: bioRxiv or medRxiv preprint supplement (doi:10.1101/2022.10.11.22280938), 2022-10-13

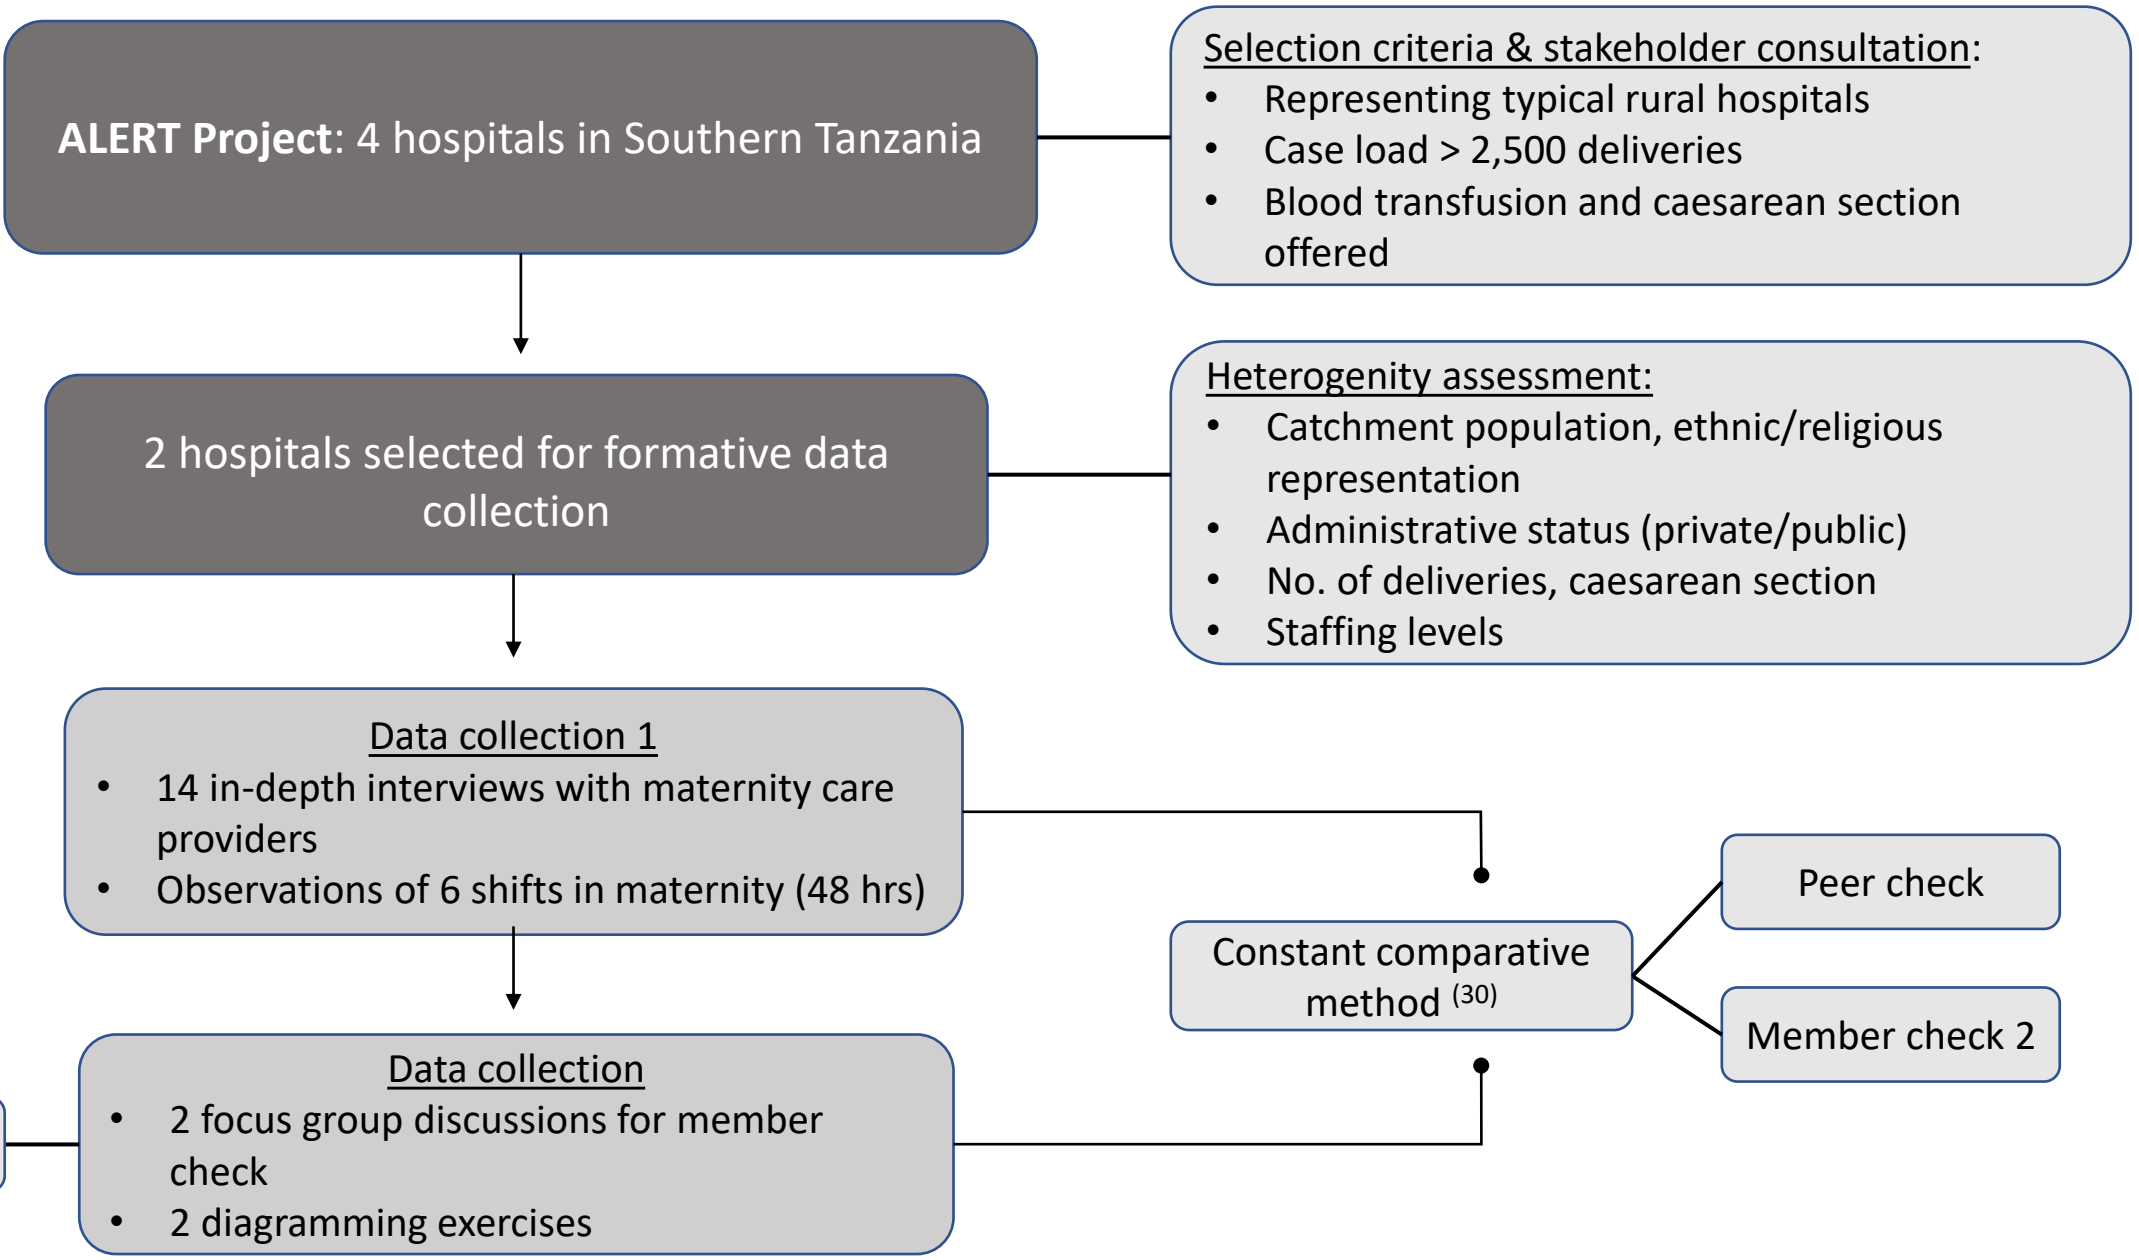

Supplement: Supplementary file [file media-1.pdf]
